# Supplementary material for: Chimeric antigen receptors that trigger phagocytosis
Source: eLife journal article supplement (doi:10.7554/elife.36688), 2018-06-04
Supplement: supp [file elife_poa_e36688_Key_Resources.xlsx]

## Sheet: Template
Reagent type. Duplicate rows as needed. Order is flexible, but row titles must be preserved. Species (mandatory if applicable). Append in parentheses. First mention, use full genus. Sex (if applicable). Add within parentheses after species.	Designation. Symbol/name used in publication. Separate multiple entries with semi-colon, space. (If semi-colon within designation, delimit wtith double quotes.)	Source (public). Stock center, company, data repository. Reference. Include PMID or DOI; use “this paper” if new. If neither applies enter “other” and explain in Additional Information.	Identifiers. Format as ID_source:identifier. Separate multiple entries with semi-colon, space. Include catalog numbers, stock numbers, database IDs or accession numbers, RRIDs.	Additional information. Mandatory if column C entry is “this paper” or “other”. Description of new reagent; laboratory from which reagent obtained; other pertinent information. For antibodies, indicate dilution and conditions used.
Key Resources Table
Reagent type (species) or resource	Designation	Source or reference	Identifiers	Additional information
Cell line (Mus musculus)	J774A.1 Macrophages	UCSF Cell Culture Facility
Cell line (Homo sapiens)	Raji B Cells	Other		Obtained from M. McManus, UCSF
Cell line (Mus musculus)	3t3 Fibroblasts	UCSF Cell Culture Facility
Cell line (Mus musculus)	C57BL/6J	PMID: 21356739		Bone Marrow Derived Macrophages (BMDM)
Cell line (Mus musculus)	C57BL/6J	PMID: 7489412		Bone Marrow derived Dendritic Cells (BMDC)
Cell line (Homo sapiens)	HEK293T cells	UCSF Cell Culture Facility		Lentivirus production
Genetic Reagent (Mus musculus)	OTI	PMID: 8287475		E. Roberts/M. Krummel Lab UCSF
recombinant DNA reagent	CD19-mMegf10 CAR	this paper		Signal peptide: aa 1-21 CD8 (Uniprot Q96QR6_HUMAN) Extracellular antibody sequence: V-L chain: aa 23-130 anti-CD19 CAR (Genbank AMZ04819) -- GS linker: ggtggcggtggctcgggcggtggtgggtcgggtggcggcggatct -- V-H chain: aa 148-267 anti-CD19 CAR (Genbank AMZ04819) Transmembrane: aa 138-206 CD8 (Uniprot Q96QR6_HUMAN) Cytosolic sequence: aa 879-1147 Mouse Megf10 (Uniprot Q6DIB5 (MEG10_MOUSE)) Fluorophore: m…
recombinant DNA reagent	CD19-FcGamma CAR	this paper		Signal peptide: aa 1-21 CD8 (Uniprot Q96QR6_HUMAN) Extracellular antibody sequence: V-L chain: aa 23-130 anti-CD19 CAR (Genbank AMZ04819) -- GS linker: ggtggcggtggctcgggcggtggtgggtcgggtggcggcggatct -- V-H chain: aa 148-267 anti-CD19 CAR (Genbank AMZ04819) Transmembrane: aa 138-206 CD8 (Uniprot Q96QR6_HUMAN) Cytosolic sequence: aa 19-86 Mouse Fc ERG precursor (Uniprot P20491 (FCERG_MOUSE)) Fluorop…
recombinant DNA reagent	CD19-empty CAR	this paper		Signal peptide: aa 1-21 CD8 (Uniprot Q96QR6_HUMAN) Extracellular antibody sequence: V-L chain: aa 23-130 anti-CD19 CAR (Genbank AMZ04819) -- GS linker: ggtggcggtggctcgggcggtggtgggtcgggtggcggcggatct -- V-H chain: aa 148-267 anti-CD19 CAR (Genbank AMZ04819) Transmembrane: aa 138-206 CD8 (Uniprot Q96QR6_HUMAN) Cytosolic sequence: basic linker NHRNRRR (nucleotide AACCACAGGAACCGAAGACGT) Fluorophore: m…
recombinant DNA reagent	CD22-Megf10 CAR	this paper		Signal peptide: aa 1-21 CSF2R (Uniprot P15509 (CSF2R_HUMAN)) Extracellular antibody sequence: aa 22-258 of translated JP 2016502512-A/1: M971 Chimeric Antigen (Genbank HZ530416.1) Transmembrane: aa 138-206 CD8 (Uniprot Q96QR6_HUMAN) Cytosolic sequence: aa 879-1147 Mouse Megf10 (Uniprot Q6DIB5 (MEG10_MOUSE)) Fluorophore: mGFP
recombinant DNA reagent	CD22-empty CAR	this paper		Signal peptide: aa 1-21 CSF2R (Uniprot P15509 (CSF2R_HUMAN)) Extracellular antibody sequence: aa 22-258 of translated JP 2016502512-A/1: M971 Chimeric Antigen (Genbank HZ530416.1) Transmembrane: aa 138-206 CD8 (Uniprot Q96QR6_HUMAN) Cytosolic sequence: basic linker NHRNRRR (nucleotide AACCACAGGAACCGAAGACGT) Fluorophore: mGFP
recombinant DNA reagent	CD19-MerTK CAR	this paper		Signal peptide: aa 1-21 CD8 (Uniprot Q96QR6_HUMAN) Extracellular antibody sequence: V-L chain: aa 23-130 anti-CD19 CAR (Genbank AMZ04819) -- GS linker: ggtggcggtggctcgggcggtggtgggtcgggtggcggcggatct -- V-H chain: aa 148-267 anti-CD19 CAR (Genbank AMZ04819) Transmembrane: aa 138-206 CD8 (Uniprot Q96QR6_HUMAN) Cytosolic sequence: aa 519-994 Mouse MerTK (Uniprot Q60805 (MERTK_MOUSE)) Fluorophore: mGFP
recombinant DNA reagent	CD19-Bai1 CAR	this paper		Signal peptide: aa 1-21 CD8 (Uniprot Q96QR6_HUMAN) Extracellular antibody sequence: V-L chain: aa 23-130 anti-CD19 CAR (Genbank AMZ04819) -- GS linker: ggtggcggtggctcgggcggtggtgggtcgggtggcggcggatct -- V-H chain: aa 148-267 anti-CD19 CAR (Genbank AMZ04819) Transmembrane: aa 138-206 CD8 (Uniprot Q96QR6_HUMAN) Cytosolic sequence: aa 1188-1582 Mouse Bai1 (Uniprot Q3UHD1 (BAI1_MOUSE))Fluorophore: mGFP
recombinant DNA reagent	CD19-CD3zeta CAR	this paper		Signal peptide: aa 1-21 CD8 (Uniprot Q96QR6_HUMAN) Extracellular antibody sequence: V-L chain: aa 23-130 anti-CD19 CAR (Genbank AMZ04819) -- GS linker: ggtggcggtggctcgggcggtggtgggtcgggtggcggcggatct -- V-H chain: aa 148-267 anti-CD19 CAR (Genbank AMZ04819) Transmembrane: aa 138-206 CD8 (Uniprot Q96QR6_HUMAN) Cytosolic sequence: aa 52-164, Human TCR CD3 zeta chain (Uniprot P20963) Fluorophore: sfGFP
recombinant DNA reagent	CD19-PI3K CAR	this paper		Signal peptide: aa 1-21 CD8 (Uniprot Q96QR6_HUMAN) Extracellular antibody sequence: V-L chain: aa 23-130 anti-CD19 CAR (Genbank AMZ04819) -- GS linker: ggtggcggtggctcgggcggtggtgggtcgggtggcggcggatct -- V-H chain: aa 148-267 anti-CD19 CAR (Genbank AMZ04819) Transmembrane: aa 138-206 CD8 (Uniprot Q96QR6_HUMAN) Cytosolic sequence: aa 500-534 Mouse CD19 (Uniprot CD19_MOUSE) Fluorophore: mCherry
recombinant DNA reagent	CD19 tandem CAR	this paper		Signal peptide: aa 1-21 CD8 (Uniprot Q96QR6_HUMAN) Extracellular antibody sequence: V-L chain: aa 23-130 anti-CD19 CAR (Genbank AMZ04819) -- GS linker: ggtggcggtggctcgggcggtggtgggtcgggtggcggcggatct -- V-H chain: aa 148-267 anti-CD19 CAR (Genbank AMZ04819) Transmembrane: aa 138-206 CD8 (Uniprot Q96QR6_HUMAN) Cytosolic sequence: aa 500-534 Mouse CD19 (Uniprot CD19_MOUSE) fused to aa 19-86 Mouse Fc …
recombinant DNA reagent	GFP-CaaX	this paper		eGFP fused to a c terminal CaaX targeting sequence: aaaatgtccaaggatggtaagaaaaagaagaagaagtcaaaaaccaagtgtgttatcatg
recombinant DNA reagent	mCherry-CaaX	this paper		mCherry fused to a c terminal CaaX targeting sequence: aaaatgtccaaggatggtaagaaaaagaagaagaagtcaaaaaccaagtgtgttatcatg
recombinant DNA reagent	OVA/p2a/mCherry-CaaX	this paper		Cytoplasmic Ovalbumin (UNIPROT: SERPINB14) /p2a site: GGAAGCGGAGCTACTAACTTCAGCCTGCTGAAGCAGGCTGGAGACGTGGAGGAGAACCCTGGACCT/ followed by mCherry fused to a c terminal CaaX targeting sequence: aaaatgtccaaggatggtaagaaaaagaagaagaagtcaaaaaccaagtgtgttatcatg
peptide, recombinant protein	His10-CD3 zeta	Hui et al. NSMB 2014 PMID: 24463463		aa 52-164, Human TCR CD3 zeta chain (Uniprot CD3Z_HUMAN) fused to Hisx10 tag
peptide, recombinant protein	His10-FcRɣ	this paper		aa 45-85, Human FcRɣ (Uniprot FCERG_HUMAN) fused to Hisx10 tag
peptide, recombinant protein	SNAP-Syk tSH2	this paper		aa 1-262, Mouse Syk (Uniprot KSYK_MOUSE) with N-term SNAP tag
peptide, recombinant protein	His10-Lck Y505F	Hui et al. NSMB 2014 PMID: 24463463		full length Human Lck with inhibitory Tyr 505 mutated to Phe (Uniprot LCK_HUMAN) fused to Hisx10 tag
antibody	anti phospho-Tyrosine	Santa Cruz	PY20	1:100 IF primary
antibody	anti mouse IgG coupled to Alexa Fluor 647	Thermo/Lifetech	A21236	1:200 IF secondary
antibody	anti mouse CD11c coupled to APC	BioLegend	117313	FACS
antibody	anti mouse F4/80 coupled to APC/Cy7	BioLegend	123117	FACS
other	DMEM	Gibco	11965-092
other	Pen-Strep-Glutamine	Corning	30-009-Cl
other	Fetal Bovine Serum (FBS)	Atlanta Biologicals	S1150H
other	RPMI	Gibco	11875-093
other	HEPES	Gibco	1530080
other	2-Mercaptoethanol	Sigma	M6250-100mL
commercial assay or kit	MycoAlert Mycoplasma Testing Kit	Lonza	LT07-318
recombinant DNA reagent	pMD2.G lentiviral plasmid	other	Addgene 12259	D. Stainier, Max Planck; VSV-G envelope
recombinant DNA reagent	pCMV-dR8.91	other	Current Addgene 8455
recombinant DNA reagent	pHRSIN-CSGW	other		As cited James and Vale 2012, PMID: 22763440
other	Lipofectamine LTX	Invitrogen	15338-100	Lentivirus production
other	Lipofectamine	Invitrogen	18324-012	Added to spin infections to improve transduction
other	Hamilton Gastight Syringes	Hamilton	8 1100
other	POPC	Avanti	850457
other	Ni2+-DGS-NTA	Avanti	790404
other	PEG5000-PE	Avanti	880230
other	atto390 DOPE	ATTO-TEC GmbH	AD 390-161
other	PBS (Tissue Culture Grade)	Gibco	20012050
other	Bioruptor Pico	Diagenode		Used for producing SUVs
other	5 um silica microspheres	Bangs	SS05N
peptide, recombinant protein	CD19-His8	Sino Biological	11880H08H50
peptide, recombinant protein	CD22-His8	Sino Biological	11958H08H50
other	2.5 um silica microspheres (size titration)	Corpuscular	C-SIO-2.5
other	5 um silica microspheres (size titration)	Corpuscular	C-SIO-5
other	10 um silica microspheres (size titration)	Corpuscular	C-SIO-10
other	15 um silica microspheres (size titration)	Corpuscular	C-SIO-15
other	20 um silica microspheres (size titration)	Corpuscular	C-SIO-20
other	Low retention tubes for microsphere cleaning	Eppendorf	22431081
other	MatriPlate	Brooks	MGB096-1-2-LG-L
peptide, recombinant protein	M-CSF	Peprotech	315-02
other	IMDM	Thermo	12440079
other	Retronectin	Clontech	T100A
commercial assay or kit	CD8+ T cell purification kit	Stemcell	19853
other	eFluor670 proliferation dye	Thermo	65-0840-85
chemical compound, drug	phRSIN-CSGW	Sigma	L4516
other	Fluorobrite DMEM	Gibco	A1896701
other	DMEM minus phenol red	Gibco	A14430-01
other	Rhodamine PE	Avanti	810150C
other	DOPS	Avanti	840035C
other	SNAP-Cell 505-Star	NEB	S9103S
other	PD MiniTrap G-25 column	GE Healthcare	28-9225-29 AB
other	6.4% Paraformaldehyde solution	Electron Microscopy Sciences	50980495
chemical compound, drug	AlexaFluor 647 Phalloidin	Thermo/Molecular Probes	A22284
software, algorithm	ImageJ	NIH
software, algorithm	Illustrator	Adobe	CC, CS6
software, algorithm	Photoshop	Adobe	CC, CS6
software, algorithm	Fiji	https://fiji.sc/
software, algorithm	Prism	GraphPad	7
antibody	anti human CD19 (mouse antibody)	OriGene	TA506240 Clone OTI2F6	IgG2a mouse monoclonal antibody
antibody	anti human CD47 (mouse antibody)	BD	556044 Clone B6H12	IgG1 mouse monoclonal antibody
antibody	anti Ovalbumin (rabbit antibody)	Pierce	PA1-196	IgG rabbit polyclonal antibody

## Sheet: Notes
Introduction
The Key Resources Table is designed to highlight the reagents and resources used in a specific study. Please include the genetically modified organisms and strains, cell lines, reagents, and software that are essential to reproduce the results presented. Note that datasets should be included in the datasets section of the submission form.
Please include a completed Key Resources Table at the start of the Materials and Methods section within your article file (this table does not need to be numbered). For consistency, please do not add subheadings to the table. Any references in the Source column should also be included in the list of references. Datasets should be entered within the datasets section of the submission form. A table…
The Key Resources Table does not need to be an exhaustive list of all the materials and resources used (e.g., essential chemicals and standard culture media do not need to be included). Please ensure that the items listed in the table are reported in the Materials and Methods section within the context of their use. We suggest that no more than ten primers and RNA sequences are included in this t…
Guidelines for creation of the Key Resources Table
Some of the constraints below are imposed to allow automated parsing of the table.
Columns (general):
(1) Column order and headings must be preserved.
(2) Columns A-E should not be removed, even if not used.
(3) Columns can be appended (F, G, etc.) for internal use.
Rows (general):
(1) Row titles (preceding the parentheses) must be preserved.
(2) Row one (column headings) should not be removed.
(3) Row 2 (headings with instructions) can be removed.
(4) Order of the rows can be changed.
(5) Clustering of multiple reagents of one type recommended, but is not mandatory.
(6) Reagent types indicated on template that are not used can be removed.
(7) Reagent types not represented in the template: use “other”.
Column A: Reagent type (mandatory)
(1) Row title (preceding parentheses) cannot be changed.
(2) See descriptions of categories in “Reagent categories” section below.
(3) If appropriate, include species within parentheses. Use full genus and full species for first mention; thereafter, initial for genus may be used.
(4) If appropriate, indicate sex after species (within the parentheses); separate by comma, space.
(5) See additional information in the section “Rows (general)” above.
Column B: Symbol/name used in publication (mandatory)
(1) This is a free-text field; there are no formatting constraints, except for separation of multiple entries by semi-colon, space.
(2) Should indicate exactly how the reagent is referred to in the publication. If several designations are used for one reagent, can include more than one entry, separated by semi-colon, space. If one designation has been used to refer to several different reagents, list each reagent separately and include a unique identifier or description parenthetically.
(3) If there is a semi-colon within the designation used, add double quotes around the entire phrase.
(4) Additional defining information can be included parenthetically (if brief).
Columns C: Source (mandatory)
(1) If reagent obtained from a public source, such as a stock center or company, list resource name.
(2) If not obtained from public source, but a published description is available, list the DOI or PMID for the publication.
(3) If reagent newly created in the publication, enter “this paper”.
(4) If none of the above, enter “other” and explain in Additional Information (Column E).
(5) If it is appropriate to indicate both a publication and a lab or researcher that provided the reagent, list the publication in this field and the lab or researcher in Additional Information.
Column D: Identifiers (not mandatory; use if possible)
(1) Use the format “ID_source:identifier” with a colon and no spaces. Separate multiple entries with a semi-colon, space.
(2) If possible, use the recommended abbreviation for the ID_source (see below).
(3) Multiple identifiers, even if redundant, are useful for validation. In some case a more general identifier (for a stock, for instance) can be combined with a more precise identifier (for the allele of interest in that stock).
(4) Inclusion of database identifiers is strongly encouraged to facilitate accurate incorporation of published data into appropriate biological databases.
Column E: Additional information
(1) Mandatory if column C entry is “this paper” or “other”. Description of new reagent or laboratory from which reagent obtained. (Free text)
(2) For antibodies, indicate dilution in parentheses (to avoid auto-formatting problems).
(3) Other pertinent information, including pointers to supplementary information or Methods section, if appropriate. (Free text)
Additional columns can be added for internal purposes (and removed prior to submission for publication): tracking acquisition by the lab, lab-specific stock numbers, storage location in the lab, comments about problems or QC, etc.
Reagent and resource categories
● Gene (indicate species) - not strictly a reagent, but unambiguous identification critical for genetic research and genetic databases.
● Strain, strain background (indicate species) - applies to whole organism; includes bacterial and virus strains or isolates. Indicate sex, if applicable.
● Genetic reagent (indicate species) - applies to mutations and variants in whole organism, including transgenically introduced constructs. For transgenic lines, indicate host species. Indicate sex, if applicable.
● Cell line (indicate species) - if a primary cell line, describe in Additional Information. Indicate sex, if applicable.
● Transfected construct (indicate species) - in cell line. Generally, indicate species of cell line; use species of construct component if that is more relevant and explain in Additional Information.
● Biological sample (indicate species) - any other biological entity, ranging from isolated tissue to defined population; describe in Additional Information. Indicate sex, if applicable.
● Antibody - include host organism common name and clonality (e.g., “mouse monoclonal”); include dilution used in Additional Information (within parentheses to avoid auto-formatting problems).
● Recombinant DNA reagent - traditional cultured clones, plasmids, cDNAs, etc., including recombinant DNA libraries.
● Sequence-based reagent - oligonucleotides, primers, morpholinos, etc.; indicate sequence.
● Peptide, recombinant protein - generally, commercially available reagents.
● Chemical compound, drug - generally, commercially available reagents.
● Commercial assay, kit - detection assays; labeling and sample preparation kits.
● Software, algorithm - newly created or previously existing.
● Other - miscellaneous other categories, including histological stains.
