# Supplementary figures and images for: Chimeric antigen receptors that trigger phagocytosis
Source: eLife journal article supplement (doi:10.7554/elife.36688), 2018-06-04

Figure 3- figure supplement 1: F-actin is enriched at the cell-target synapse

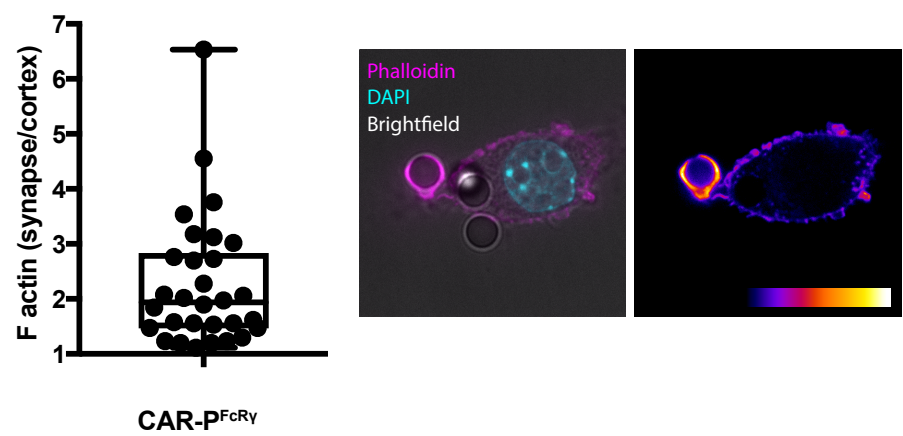

Supplement: supp [file elife-36688-supp-v2.zip]
